# Supplementary material
Source: PubMed Central journal article supplement (PMC5286955)
Supplement: 2016_155424-Disclosures_and_Contributions.pdf [file 2016_155424-Disclosures_and_Contributions.pdf]

Haematologica  
HAEMATOL/2016/155424  
Version 2

Comprehensive translocation and clonality detection in  
lymphoproliferative disorders by next generation sequencing

Dorte Wren, Brian A. Walker, Monika Bruggemann, Mark A.  
Catherwood, Christiane Pott, Kostas Stamatopoulos, Anton W.  
Langerak, and David Gonzalez  
Collaborative Groups: EuroClonality-NGS Consortium

Disclosures: none

Contributions: DG and BAW designed the study. DW, BAW and DG performed research and analysis and wrote the manuscript. MB, MAC, CP, KS, AWL provided the materials and critically reviewed the manuscript. DG and AWL supervised the study.
